# Supplementary material for: The Class A β-Lactamase Produced by Burkholderia Species Compromises the Potency of Tebipenem against a Panel of Isolates from the United States
Source: MDPI journal article supplement (doi:10.3390/antibiotics11050674), 2022-05-17
Supplement: s1 [file s1]

**Table S1.** Antimicrobial susceptibility testing results for 151 Bcc and *B. gladioli* conducted via agar dilution methodology.

| Strain                        | TEBI | IPM* | CAZ* | SXT*    |
|-------------------------------|------|------|------|---------|
| Susceptible                   | 0    | 24   | 94   | 92      |
| Intermediate                  | 0    | 14   | 14   | N/A     |
| Resistant                     | 151  | 113  | 43   | 54      |
| <i>B. ambifaria</i> AU11161   | >4   | 16   | 128  | 16/304  |
| <i>B. ambifaria</i> AU19862   | 4    | 2    | 2    | 0.5/9.5 |
| <i>B. ambifaria</i> AU20319   | >4   | 4    | 64   | 1/19    |
| <i>B. ambifaria</i> AU5203    | >4   | 4    | 4    | 1/19    |
| <i>B. arboris</i> AU14372     | >4   | 32   | 8    | 1/19    |
| <i>B. arboris</i> AU24192     | >4   | 8    | 4    | 1/19    |
| <i>B. cenocepacia</i> AU0133  | >4   | 32   | 4    | 2/38    |
| <i>B. cenocepacia</i> AU0583  | 4    | 16   | 4    | 8/152   |
| <i>B. cenocepacia</i> AU0756  | >4   | 128  | 128  | 8/152   |
| <i>B. cenocepacia</i> AU10321 | >4   | 32   | 32   | 8/152   |
| <i>B. cenocepacia</i> AU11339 | 4    | 4    | 4    | 1/19    |
| <i>B. cenocepacia</i> AU12265 | >4   | 16   | 4    | 2/38    |
| <i>B. cenocepacia</i> AU12571 | >4   | 8    | 2    | 0.5/9.5 |
| <i>B. cenocepacia</i> AU12659 | >4   | 4    | 8    | 0.5/9.5 |
| <i>B. cenocepacia</i> AU13262 | >4   | 8    | 16   | 1/19    |
| <i>B. cenocepacia</i> AU14093 | >4   | 64   | 128  | 8/152   |
| <i>B. cenocepacia</i> AU14109 | >4   | 32   | 32   | 16/304  |
| <i>B. cenocepacia</i> AU14381 | >4   | 16   | 8    | 16/304  |
| <i>B. cenocepacia</i> AU16448 | >4   | 16   | 4    | 4/76    |
| <i>B. cenocepacia</i> AU17796 | >4   | 32   | 4    | 0.5/9.5 |
| <i>B. cenocepacia</i> AU19276 | 4    | 2    | 8    | 1/19    |

|                               |    |     |     |         |
|-------------------------------|----|-----|-----|---------|
| <i>B. cenocepacia</i> AU19530 | >4 | 128 | 16  | 4/76    |
| <i>B. cenocepacia</i> AU19684 | >4 | 8   | 32  | 16/304  |
| <i>B. cenocepacia</i> AU20146 | 4  | 8   | 4   | 1/19    |
| <i>B. cenocepacia</i> AU20545 | 4  | 4   | 4   | 1/19    |
| <i>B. cenocepacia</i> AU20902 | >4 | 16  | 4   | 0.5/9.5 |
| <i>B. cenocepacia</i> AU20998 | >4 | 16  | 128 | 8/152   |
| <i>B. cenocepacia</i> AU21083 | >4 | 8   | 4   | 2/38    |
| <i>B. cenocepacia</i> AU22509 | >4 | 16  | 4   | 4/76    |
| <i>B. cenocepacia</i> AU24362 | >4 | 64  | 32  | 4/76    |
| <i>B. cenocepacia</i> AU28111 | 4  | 4   | 4   | 1/19    |
| <i>B. cenocepacia</i> AU29265 | 4  | 4   | 4   | 0.5/9.5 |
| <i>B. cenocepacia</i> AU3663  | >4 | 4   | 16  | 4/76    |
| <i>B. cenocepacia</i> AU6550  | >4 | 64  | 4   | 8/152   |
| <i>B. cenocepacia</i> AU8635  | >4 | 64  | 16  | 8/152   |
| <i>B. cenocepacia</i> AU9215  | >4 | 32  | 64  | 16/304  |
| <i>B. cenocepacia</i> AU9292  | 4  | 16  | 4   | 16/304  |
| <i>B. cenocepacia</i> AU9512  | >4 | 8   | 16  | 8/152   |
| <i>B. cenocepacia</i> AU9710  | 4  | 8   | 4   | 1/19    |
| <i>B. cepacia</i> AU0108      | 4  | 8   | 8   | 2/38    |
| <i>B. cepacia</i> AU0329      | 4  | 8   | 8   | 16/304  |
| <i>B. cepacia</i> AU11420     | >4 | 16  | 16  | 4/76    |
| <i>B. cepacia</i> AU13163     | >4 | 8   | 8   | 0.5/9.5 |
| <i>B. cepacia</i> AU13354     | >4 | 32  | 64  | 1/19    |
| <i>B. cepacia</i> AU15249     | 4  | 8   | 8   | 2/38    |
| <i>B. cepacia</i> AU1555      | >4 | 16  | 8   | 8/152   |
| <i>B. cepacia</i> AU15677     | 4  | 2   | 8   | 0.5/9.5 |

|                               |    |      |     |           |
|-------------------------------|----|------|-----|-----------|
| <i>B. cepacia</i> AU16396     | >4 | 16   | 8   | 2/38      |
| <i>B. cepacia</i> AU17630     | >4 | 8    | 32  | 1/19      |
| <i>B. cepacia</i> AU19265     | 4  | 4    | 8   | 2/38      |
| <i>B. cepacia</i> AU22213     | 4  | 4    | 8   | 1/19      |
| <i>B. cepacia</i> AU23707     | >4 | 32   | 8   | 2/38      |
| <i>B. cepacia</i> AU27816     | 4  | 4    | 4   | 0.5/9.5   |
| <i>B. cepacia</i> AU29493     | >4 | 8    | 16  | 0.5/9.5   |
| <i>B. contaminans</i> AU15669 | >4 | 64   | 16  | 2/38      |
| <i>B. contaminans</i> AU17641 | >4 | 16   | 8   | 2/38      |
| <i>B. contaminans</i> AU20979 | >4 | 8    | 128 | N/T       |
| <i>B. contaminans</i> AU21811 | >4 | 16   | 64  | 1/19      |
| <i>B. contaminans</i> AU22443 | >4 | 8    | 4   | 2/38      |
| <i>B. contaminans</i> AU22662 | 4  | 8    | 4   | 1/19      |
| <i>B. contaminans</i> AU25403 | 4  | 8    | 4   | 1/19      |
| <i>B. diffusa</i> AU19637     | 4  | 2    | 16  | 2/38      |
| <i>B. dolosa</i> AU12872      | >4 | 128  | 128 | 16/304    |
| <i>B. dolosa</i> AU29021      | >4 | 32   | 32  | 1/19      |
| <i>B. dolosa</i> AU29985      | >4 | 32   | 512 | 8/152     |
| <i>B. dolosa</i> AU9336       | >4 | 16   | 8   | 8/152     |
| <i>B. gladioli</i> AU0032     | 4  | 1    | 8   | 0.5/9.5   |
| <i>B. gladioli</i> AU1009     | 2  | 0.5  | 8   | 0.5/9.5   |
| <i>B. gladioli</i> AU16341    | >4 | 2    | 64  | N/T       |
| <i>B. gladioli</i> AU21101    | 1  | 0.5  | 8   | 0.25/4.75 |
| <i>B. gladioli</i> AU26456    | 1  | 0.25 | 16  | N/T       |
| <i>B. gladioli</i> AU27927    | 1  | 0.25 | 8   | 0.25/4.75 |
| <i>B. gladioli</i> AU28659    | 4  | 1    | 16  | 1/19      |

|                               |    |     |      |           |
|-------------------------------|----|-----|------|-----------|
| <i>B. gladioli</i> AU29223    | 1  | 0.5 | 8    | 0.25/4.75 |
| <i>B. gladioli</i> AU29541    | >4 | 1   | 64   | N/T       |
| <i>B. gladioli</i> AU30473    | 4  | 1   | 32   | 0.5/9.5   |
| <i>B. multivorans</i> AU10047 | >4 | 32  | 8    | 0.5/9.5   |
| <i>B. multivorans</i> AU10086 | >4 | 64  | 8    | 16/304    |
| <i>B. multivorans</i> AU10398 | >4 | 4   | 512  | 4/76      |
| <i>B. multivorans</i> AU10897 | >4 | 128 | 4    | 8/152     |
| <i>B. multivorans</i> AU11204 | 4  | 16  | 2    | 1/19      |
| <i>B. multivorans</i> AU11233 | >4 | 64  | 32   | 16/304    |
| <i>B. multivorans</i> AU11358 | >4 | 64  | 2    | 1/19      |
| <i>B. multivorans</i> AU11772 | >4 | 16  | >512 | 4/76      |
| <i>B. multivorans</i> AU12481 | 4  | 16  | 4    | 1/19      |
| <i>B. multivorans</i> AU13919 | 4  | 32  | 2    | 1/19      |
| <i>B. multivorans</i> AU14328 | 4  | 16  | 2    | 1/19      |
| <i>B. multivorans</i> AU14364 | 4  | 1   | 256  | 8/152     |
| <i>B. multivorans</i> AU14371 | 4  | 64  | 2    | 0.5/9.5   |
| <i>B. multivorans</i> AU14786 | >4 | 64  | 32   | 4/76      |
| <i>B. multivorans</i> AU15814 | >4 | 64  | 256  | 16/304    |
| <i>B. multivorans</i> AU15954 | 4  | 32  | 2    | 1/19      |
| <i>B. multivorans</i> AU16734 | >4 | 64  | 2    | 2/38      |
| <i>B. multivorans</i> AU17135 | 4  | 32  | 2    | 0.5/9.5   |
| <i>B. multivorans</i> AU17534 | >4 | 64  | 64   | 2/38      |
| <i>B. multivorans</i> AU17545 | 2  | 8   | 8    | 4/76      |
| <i>B. multivorans</i> AU18096 | >4 | 32  | 2    | 0.5/9.5   |
| <i>B. multivorans</i> AU19518 | >4 | 32  | 4    | 0.5/9.5   |
| <i>B. multivorans</i> AU19564 | >4 | 32  | 2    | 2/38      |

|                               |    |      |      |           |
|-------------------------------|----|------|------|-----------|
| <i>B. multivorans</i> AU19659 | >4 | 64   | 32   | 1/19      |
| <i>B. multivorans</i> AU19729 | >4 | 32   | 8    | >16/304   |
| <i>B. multivorans</i> AU20929 | 4  | 32   | 2    | 2/38      |
| <i>B. multivorans</i> AU21015 | >4 | 64   | 128  | 16/304    |
| <i>B. multivorans</i> AU21596 | >4 | 128  | 64   | 16/304    |
| <i>B. multivorans</i> AU21747 | 4  | 64   | 2    | 2/38      |
| <i>B. multivorans</i> AU22436 | >4 | 64   | 2    | 0.25/4.75 |
| <i>B. multivorans</i> AU22892 | 4  | 64   | 2    | 1/19      |
| <i>B. multivorans</i> AU23365 | >4 | 32   | 32   | 4/76      |
| <i>B. multivorans</i> AU23668 | 4  | 16   | 1    | 0.5/9.5   |
| <i>B. multivorans</i> AU23690 | >4 | 16   | 4    | 4/76      |
| <i>B. multivorans</i> AU23919 | 4  | 4    | 512  | 8/152     |
| <i>B. multivorans</i> AU23995 | >4 | 32   | 8    | 2/38      |
| <i>B. multivorans</i> AU24277 | >4 | 32   | 64   | 4/76      |
| <i>B. multivorans</i> AU25057 | >4 | 32   | 8    | 4/76      |
| <i>B. multivorans</i> AU25543 | 4  | 2    | 2    | 0.25/4.75 |
| <i>B. multivorans</i> AU26250 | 4  | 32   | 2    | 0.5/9.5   |
| <i>B. multivorans</i> AU26526 | >4 | 32   | 16   | 2/38      |
| <i>B. multivorans</i> AU27706 | 2  | 0.25 | 2    | 1/19      |
| <i>B. multivorans</i> AU28069 | 4  | 16   | 2    | 1/19      |
| <i>B. multivorans</i> AU28442 | >4 | 64   | >128 | N/T       |
| <i>B. multivorans</i> AU29198 | >4 | 64   | 16   | 4/76      |
| <i>B. multivorans</i> AU30050 | 4  | 32   | 1    | 1/19      |
| <i>B. multivorans</i> AU30438 | 4  | 32   | 4    | 0.5/9.5   |
| <i>B. multivorans</i> AU30441 | 4  | 32   | 2    | 0.5/9.5   |
| <i>B. multivorans</i> AU30760 | 4  | 16   | 2    | 0.5/9.5   |

|                                     |    |       |     |           |
|-------------------------------------|----|-------|-----|-----------|
| <i>B. multivorans</i> AU4057        | >4 | 64    | 2   | 0.5/9.5   |
| <i>B. pseudomultivorans</i> AU19682 | >4 | 8     | 32  | 2/38      |
| <i>B. pyrrocinia</i> AU1114         | 4  | 16    | 8   | 16/304    |
| <i>B. pyrrocinia</i> AU4348         | 4  | 32    | 16  | 8/152     |
| <i>B. seminalis</i> AU14842         | >4 | 4     | 4   | 1/19      |
| <i>B. stabilis</i> AU10235          | >4 | 16    | 256 | 4/76      |
| <i>B. stabilis</i> AU9035           | >4 | 16    | 32  | 16/304    |
| <i>B. ubonensis</i> AU7314          | >4 | 32    | 512 | 2/38      |
| <i>B. vietnamiensis</i> AU10214     | 4  | 0.25  | 8   | 0.5/9.5   |
| <i>B. vietnamiensis</i> AU19457     | >4 | 16    | 8   | 8/152     |
| <i>B. vietnamiensis</i> AU21549     | 2  | 0.25  | 2   | 1/19      |
| <i>B. vietnamiensis</i> AU26096     | >4 | 16    | 8   | 16/304    |
| <i>B. vietnamiensis</i> AU28056     | >4 | 0.5   | 4   | 0.25/4.75 |
| <i>B. vietnamiensis</i> AU28891     | >4 | 0.5   | 4   | 16/304    |
| <i>B. vietnamiensis</i> AU30387     | 2  | 0.125 | 1   | 0.5/9.5   |
| <i>B. vietnamiensis</i> AU3578      | >4 | 0.5   | 64  | 4/76      |
| <i>B. vietnamiensis</i> AU3997      | >4 | 0.25  | 2   | 1/19      |
| <i>B. vietnamiensis</i> AU5003      | >4 | 32    | 8   | 16/304    |
| Bcc Indeterminate AU18117           | >4 | 16    | 32  | 16/304    |
| Bcc Indeterminate AU12560           | >4 | 8     | 4   | 0.5/9.5   |
| Bcc indeterminate AU12848           | >4 | 16    | 64  | 1/19      |
| Bcc Indeterminate AU14915           | >4 | 64    | 32  | 4/76      |
| Bcc Indeterminate AU14962           | >4 | 16    | 8   | 1/19      |
| Bcc Indeterminate AU19821           | >4 | 64    | 32  | 2/38      |
| Bcc Indeterminate AU9162            | >4 | 8     | 8   | 1/19      |
| Bcc Indeterminate AU19076           | 4  | 8     | 4   | 2/38      |

---

CLSI breakpoints for ceftazidime (CAZ) ( $S \leq 8$  mg/L,  $I = 16$  mg/L,  $R \geq 32$  mg/L) and trimethoprim/sulfamethoxazole (SXT) ( $S \leq 2/38$  mg/L,  $R \geq 4/76$  mg/L) against Bcc were used (41). CLSI breakpoints for imipenem (IPM) ( $S \leq 2$  mg/L,  $I = 4$  mg/L,  $R \geq 8$  mg/L) against *P. aeruginosa* were used, as breakpoints against Bcc are not available (41). Provisional MIC interpretations for tebipenem (TEBI) are as follows: susceptible  $\leq 0.12$  mg/L, intermediate 0.25 mg/L, and resistant  $\geq 0.5$  mg/L.\*Data was previously published, SXT was run at a ratio of 1:19 mg/L. N/T = not tested.
